# Supplementary material for: Separation of phenylenediamine isomers by using decamethylcucurbit[5]uril
Source: Royal Society of Chemistry journal article supplement (doi:10.1039/d0nj05999d), 2021-01-01
Supplement: d0nj05999d1.pdf [file d0nj05999d1.pdf]

## Electronic Supplementary Information (ESI)

### Separation of phenylenediamine isomers by using decamethylcurbit[5]uril

Long Cao<sup>a</sup>, Han-Ling Guo<sup>a</sup>, Rui-Lian Lin<sup>b</sup>, Zhi-Hua Zhang<sup>a</sup>, Li-Fei Tian<sup>a</sup>, Jing-Xin Liu<sup>\*,b</sup> and Zhu Tao<sup>\*,a</sup>

*a* Key Laboratory of Macrocyclic and Supramolecular Chemistry of Guizhou Province, Guizhou University, Guiyang 550025, People's Republic of China.

Email Address: [gzutao@263.net](mailto:gzutao@263.net)

*b* College of Chemistry and Chemical Engineering, Anhui University of Technology, Maanshan 243002, People's Republic of China.

Email Address: [jxliu411@ahut.edu.cn](mailto:jxliu411@ahut.edu.cn)

### Table of Contents

|                                                                                                        |    |
|--------------------------------------------------------------------------------------------------------|----|
| <b>Figure S1</b> Crystal structure of Q[5]- <i>p</i> -PDA-based supramolecular chains.....             | S2 |
| <b>Figure S2</b> <sup>1</sup> H NMR titration spectra of Me <sub>10</sub> Q[5] with <i>m</i> -PDA..... | S3 |
| <b>Figure S3</b> <sup>1</sup> H NMR titration spectra of Me <sub>10</sub> Q[5] with <i>o</i> -PDA..... | S4 |
| <b>Figure S4</b> ITC profiles of Me <sub>10</sub> Q[5] with PDA isomers.....                           | S5 |
| <b>Figure S5</b> <sup>1</sup> H NMR spectra of the isolated sample .....                               | S6 |

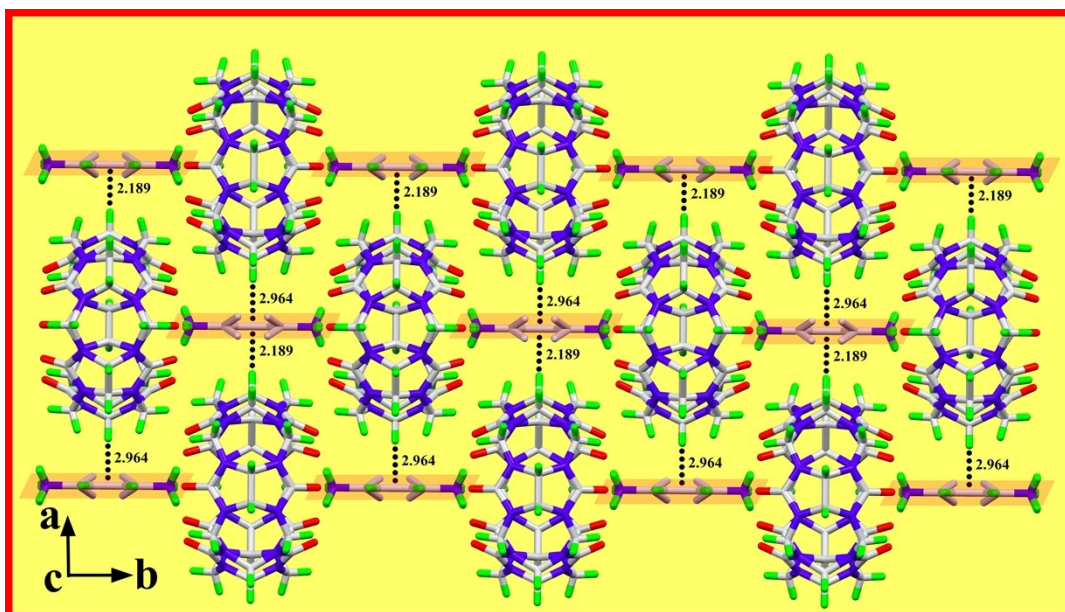

Figure S1 Crystal structure of Q[5]-*p*-PDA-based supramolecular chains.

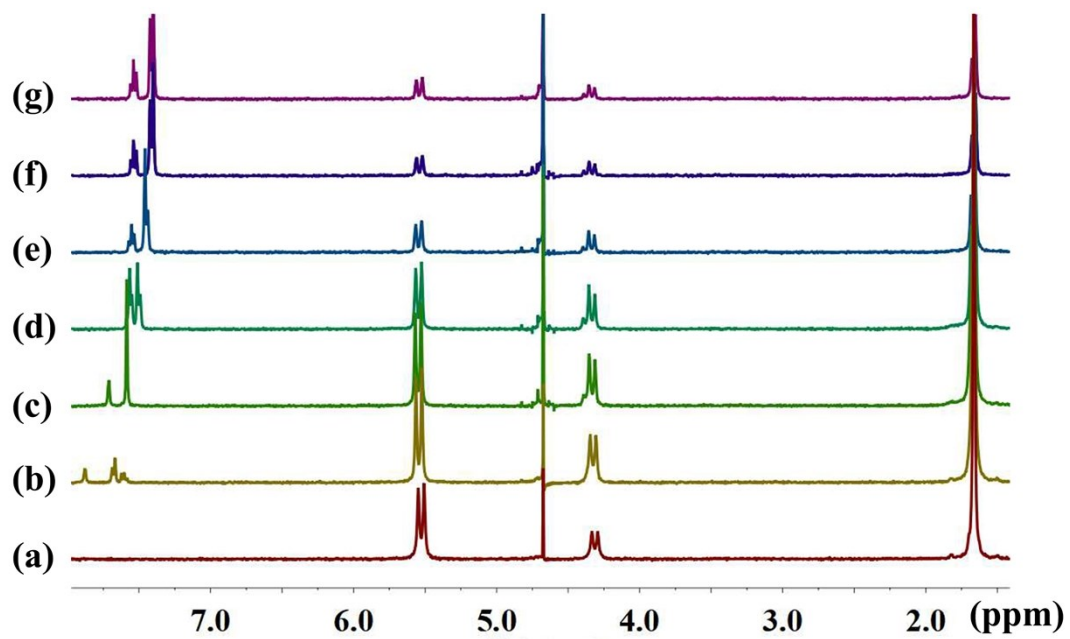

Figure S2. Titration  $^1\text{H}$  NMR spectra of  $\text{Me}_{10}\text{Q}[5]$  ( $1\ \mu\text{M}$ ) upon addition with molar equivalents of *m*-PDA: (a) 0; ( b ) 0.5; (c) 1.5; (d) 2.5; (e) 5; (f) 5.5; (g) 6.

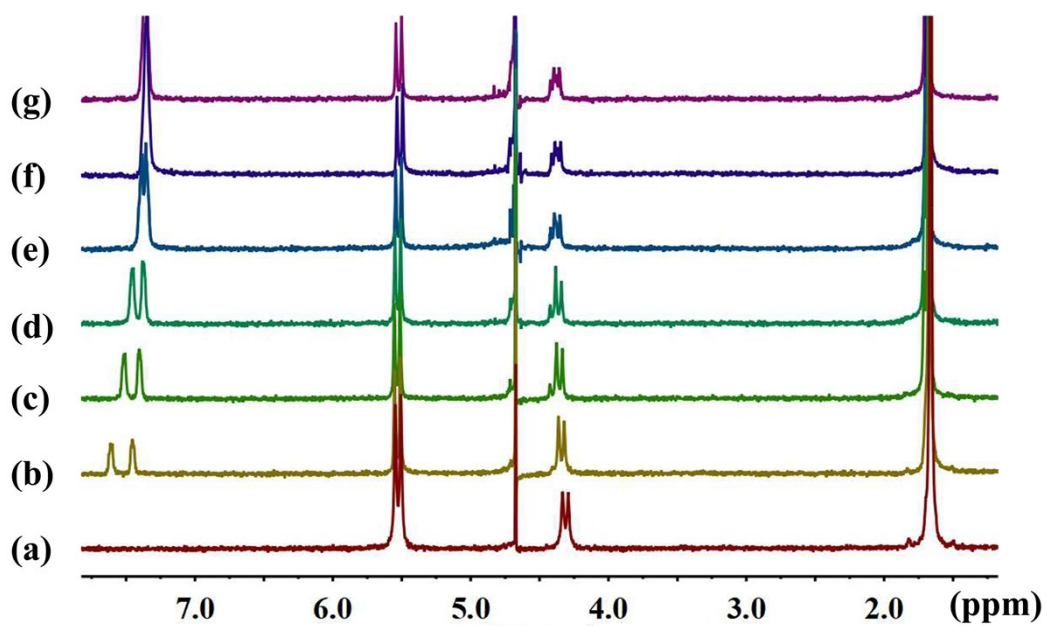

Figure S3. Titration  $^1\text{H}$  NMR spectra of  $\text{Me}_{10}\text{Q}[5]$  ( $1\ \mu\text{M}$ ) upon addition with molar equivalents of *o*-PDA: (a) 0; (b) 1; (c) 2.5; (d) 4.5; (e) 5.5; (f) 6; (g) 7.

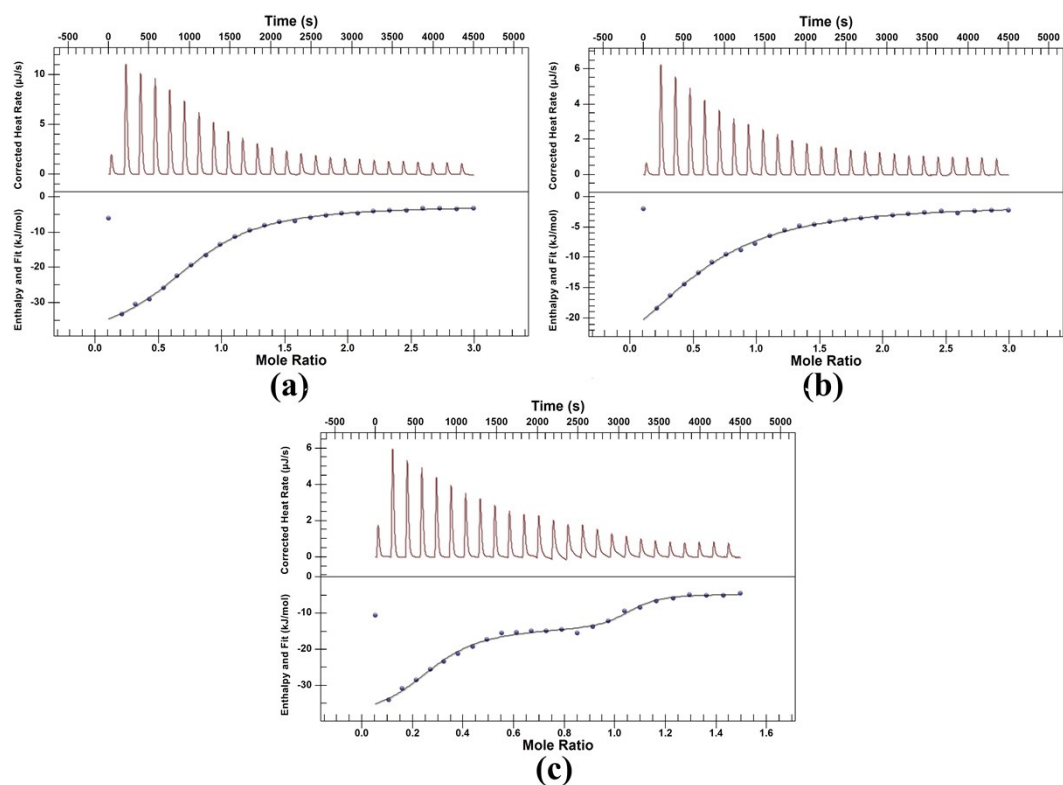

Figure S4. Isothermal titration calorimetry profiles obtained for  $\text{Me}_{10}\text{Q}[5]$  in the presence of (a) *o*-PDA, (b) *m*-PDA and (a) *p*-PDA, respectively in an aqueous HCl solution (0.05M) at 298.15 K.

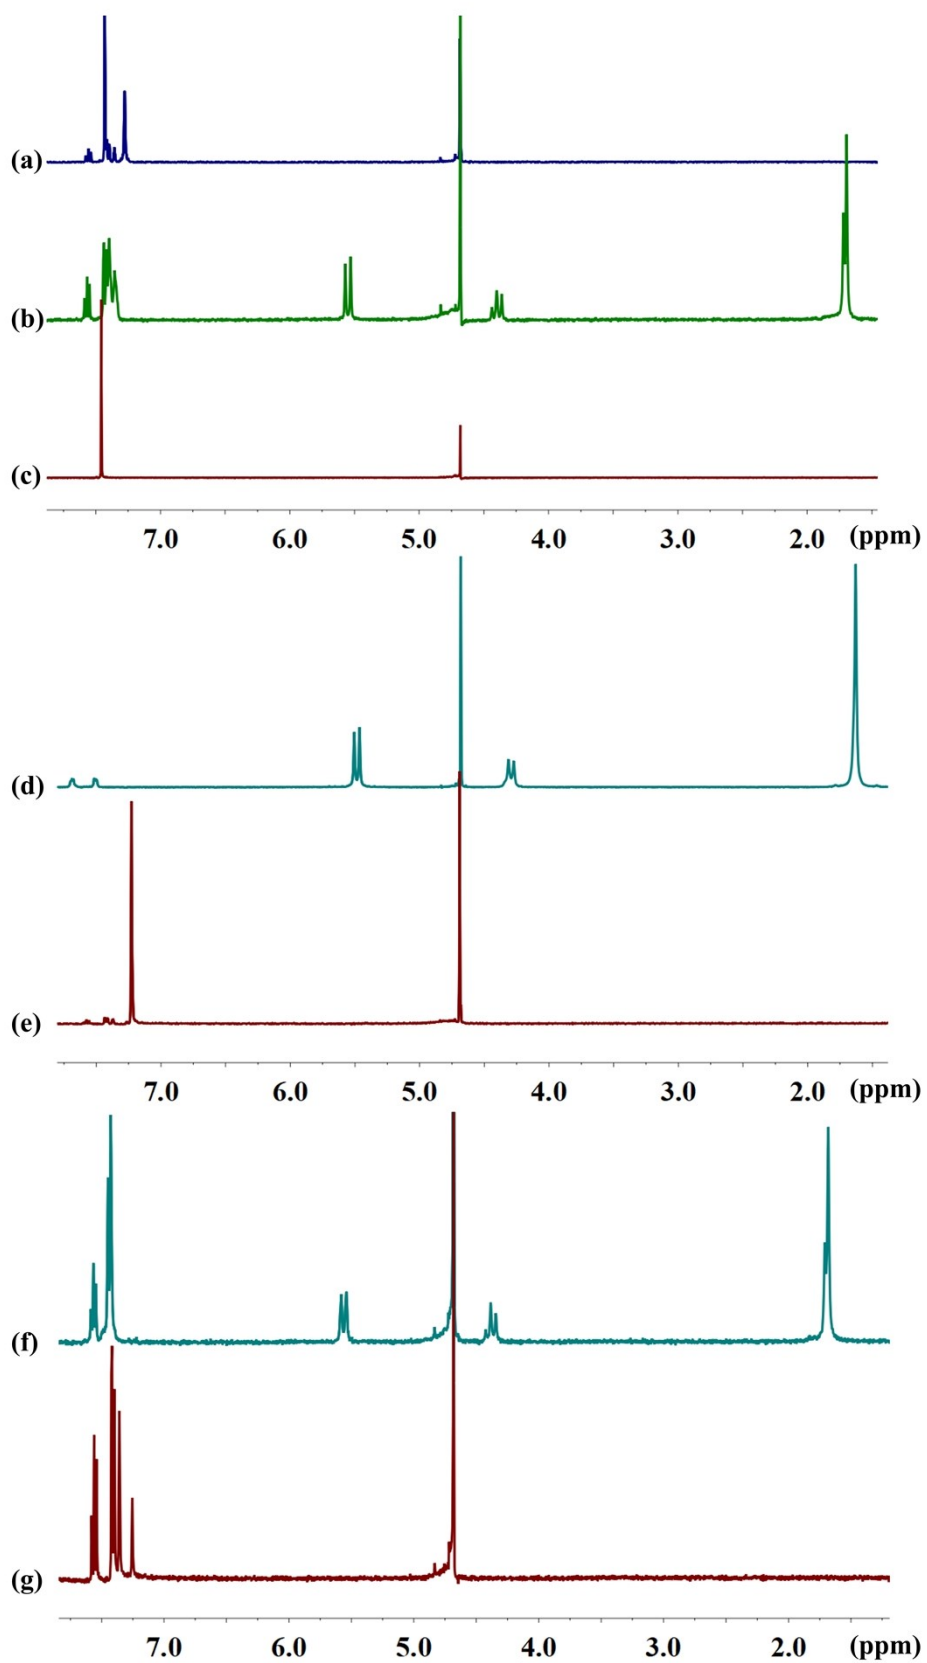

Figure S5. <sup>1</sup>H NMR spectra of sample of (a) Figure 5a; (b) Figure 5b; (c) Figure 5c (d) Figure 5d; (e) Figure 5e (f) Figure 5f and (g) Figure 5g.
